# Supplementary material for: Genomic Heritability: What Is It?
Source: PubMed Central journal article supplement (PMC4420472; doi:10.1371/journal.pgen.1005048), 2015-05-05

Scenario: SB-FTP

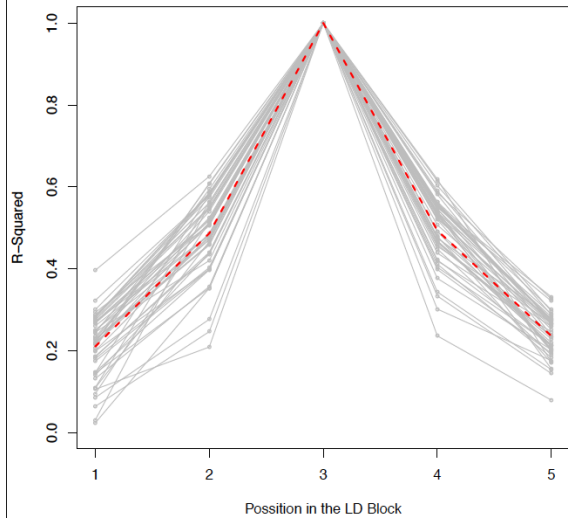

Scenario: SB-RTP

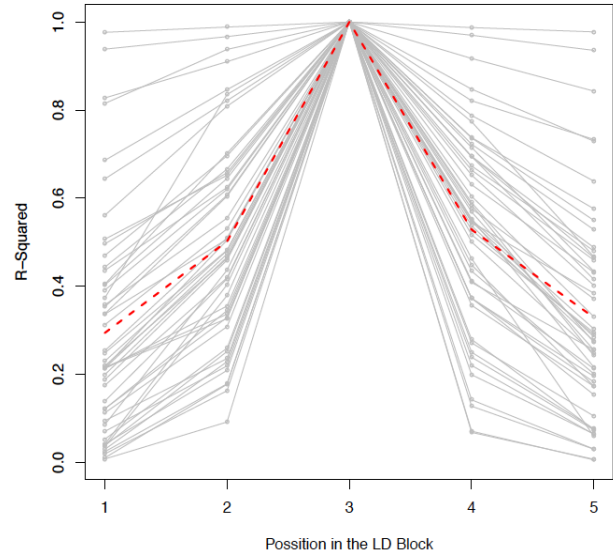

Scenario: LB-FTP

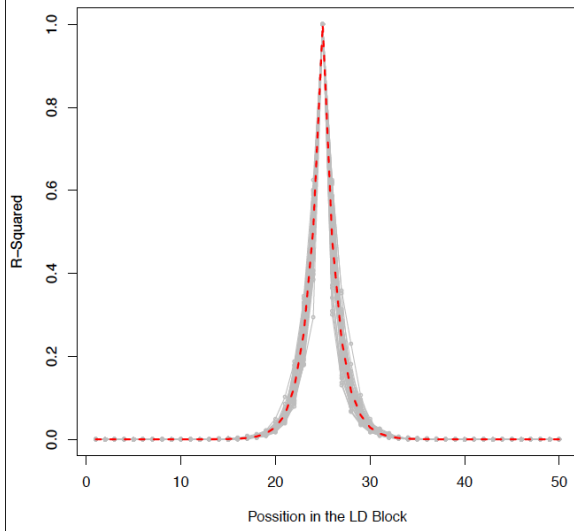

Scenario: LB-RTP

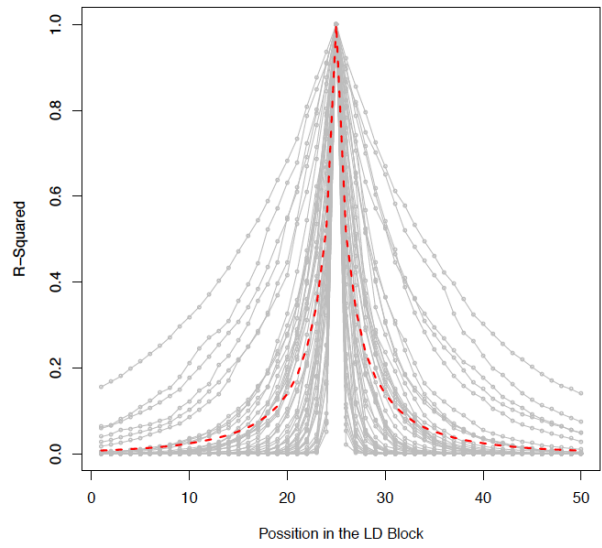

Supplement: pgen.1005048.s005.pdf [file pgen.1005048.s005.pdf]
